# Supplementary material for: Preparation of YbF3-Ho@TiO2 core–shell sub-microcrystal spheres and their application to the electrode of dye-sensitized solar cells
Source: Royal Society of Chemistry journal article supplement (doi:10.1039/d0nj02069a), 2020-01-01
Supplement: d0nj02069a1.pdf [file d0nj02069a1.pdf]

## Electronic Supplementary Information (ESI)

### **Preparation of YbF<sub>3</sub>-Ho@TiO<sub>2</sub> core-shell sub-microcrystal spheres and their application to the electrode of dye-sensitized solar cells**

Jia Yu,<sup>a,b,c,\*</sup> Yulin Yang,<sup>d,\*</sup> Chuanxiang Zhang,<sup>b,e,\*</sup> Ruiqing Fan,<sup>d</sup> Ting Su<sup>f</sup>

<sup>a</sup> *Hami Vocational & Technical College, Hami, 839000, P. R. China.*

<sup>b</sup> *Henan Key Laboratory of Coal Green Conversion, College of Chemistry and Chemical Engineering, Henan Polytechnic University, Jiaozuo, 454003, P. R. China.*

<sup>c</sup> *Hami Yuxin Energy Industry Research Institute Co., Ltd., 839000, P. R. China.*

<sup>d</sup> *MIIT Key Laboratory of Critical Materials Technology for New Energy Conversion and Storage, School of Chemistry and Chemical Engineering, Harbin Institute of Technology, Harbin 150001, P. R. China.*

<sup>e</sup> *Collaborative Innovation Center of Coal Work Safety, Jiaozuo, 454003, P. R. China.*

<sup>f</sup> *Green Chemistry Centre, College of Chemistry and Chemical Engineering, Yantai University, Yantai 264005, P. R. China.*

*Corresponding Authors E-mail addresses:*

*yujiade1987@126.com; ylyang@hit.edu.cn and zcx223@hpu.edu.cn.*

**SUPPLEMENT**

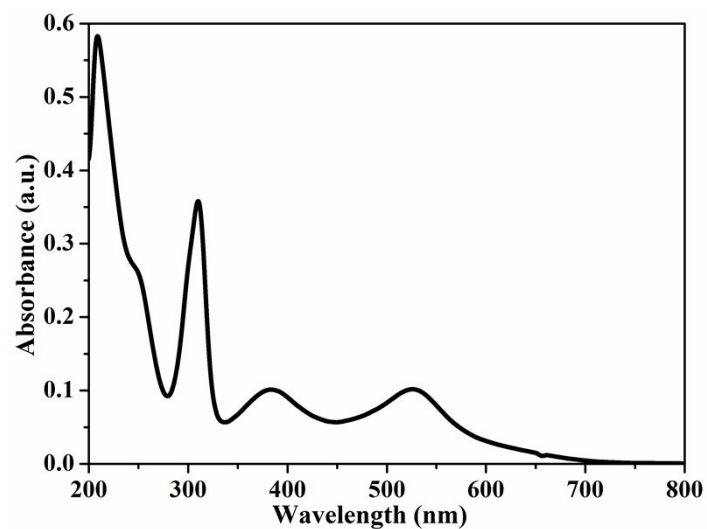

**Fig. S1** The absorbance spectrum of N719 dye in ethylalcohol.

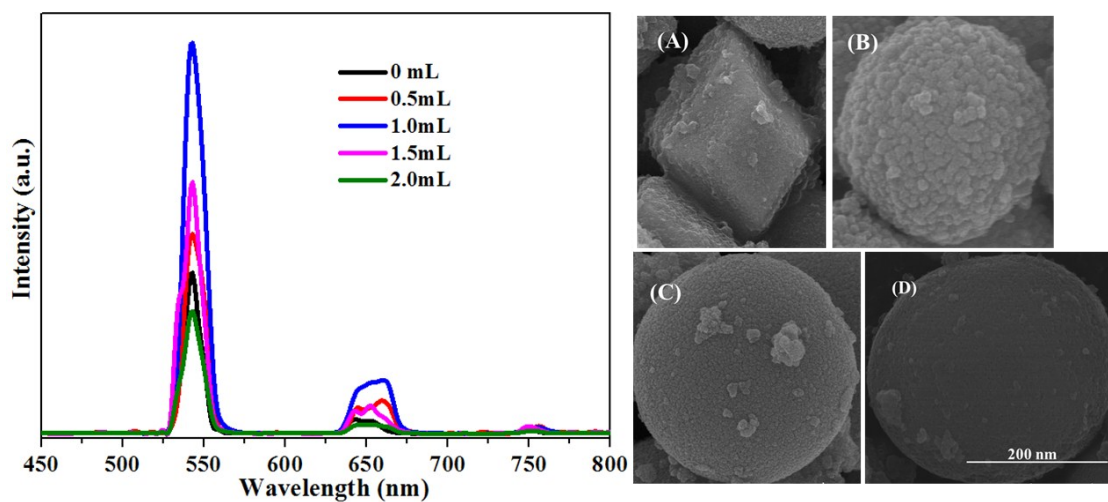

**Fig. S2** Upconversion emission spectra of  $\text{YbF}_3\text{-Ho@TiO}_2$  with different amount of titanium isopropylate in the synthesis process and the inset are their corresponding SEM images (A) 0.5 mL, (B) 1 mL, (C) 1.5 mL and (D) 2 mL.

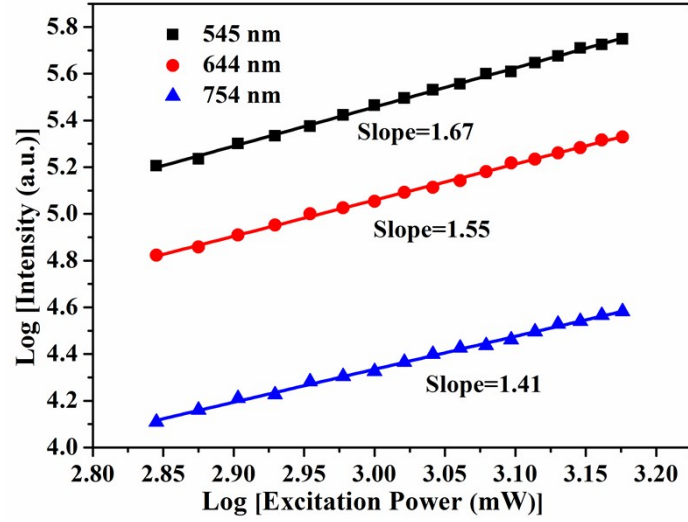

**Fig. S3** The upconversion emission intensity as a function of excitation power from a 980 nm laser at 545 nm, 644nm and 754 nm for YbF<sub>3</sub>-Ho@TiO<sub>2</sub>.

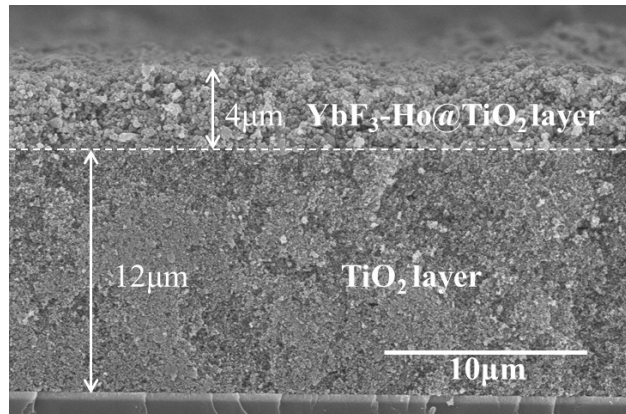

**Fig. S4** Cross-section SEM image of TiO<sub>2</sub>/YbF<sub>3</sub>-Ho@TiO<sub>2</sub> heterostructured photoanode film.

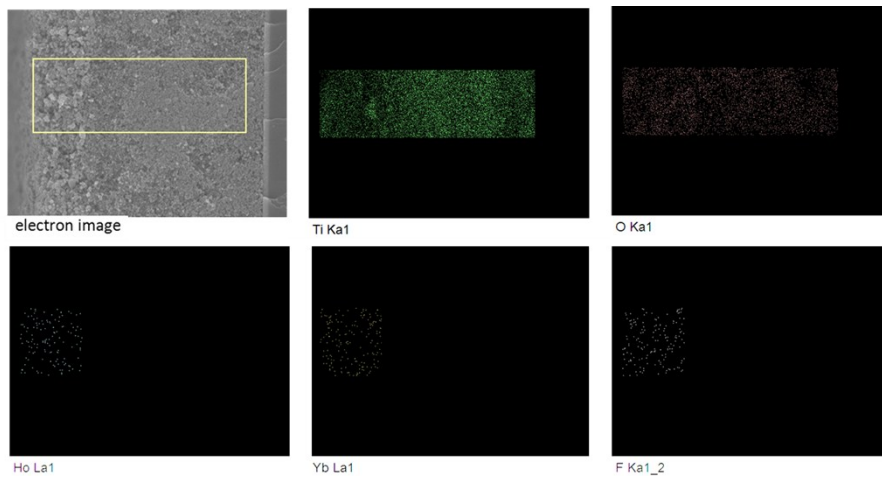

**Fig. S5** Element mapping of the cross-section TiO<sub>2</sub>/YbF<sub>3</sub>-Ho@TiO<sub>2</sub> heterostructured photoanode film.

photoanode film.

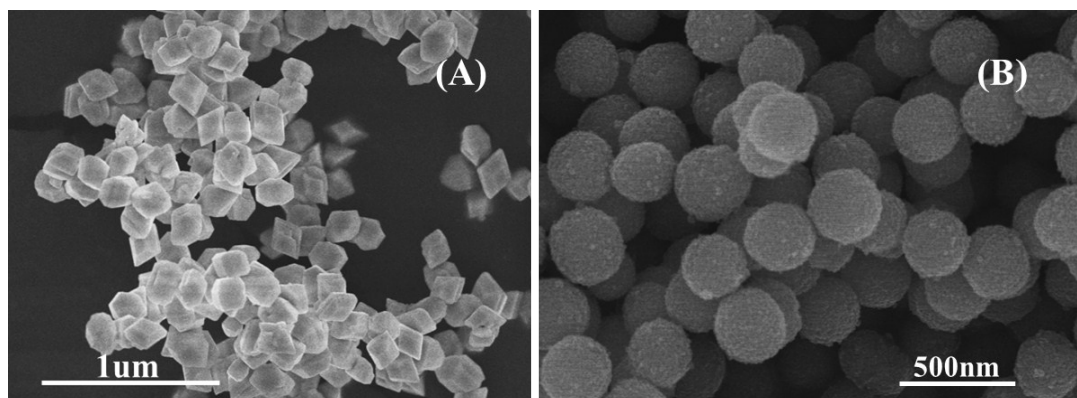

**Fig. S6** SEM images of (A) YbF<sub>3</sub> and (B) YbF<sub>3</sub>@TiO<sub>2</sub>.

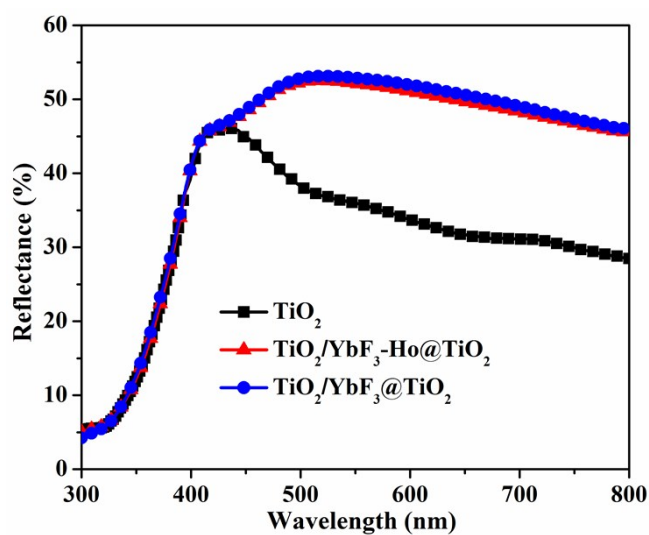

**Fig. S7** Diffused reflectance spectra of different photoanode films.

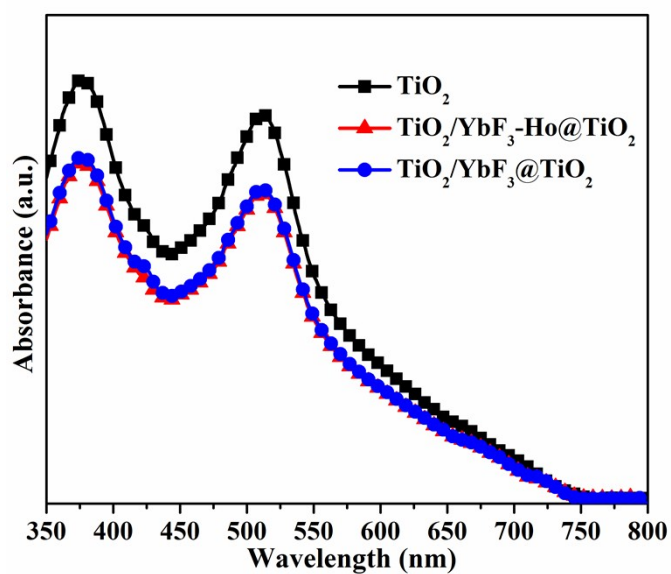

**Fig. S8** UV-vis spectra of desorbed dye solutions from sensitized photoanodes.

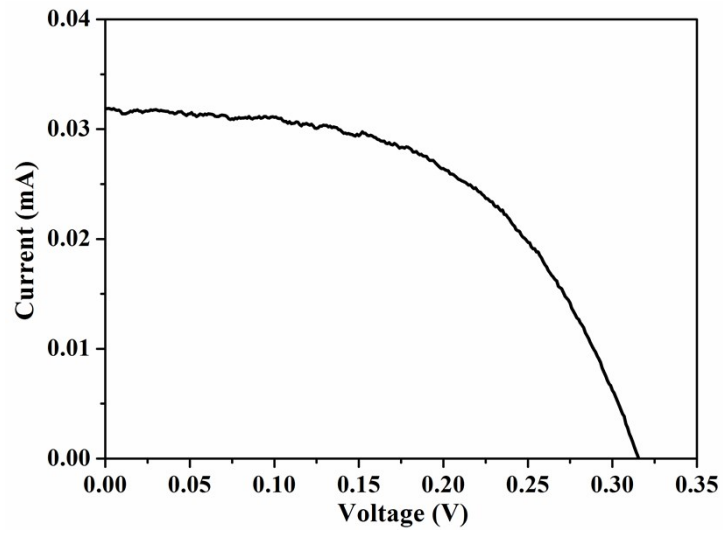

**Fig. S9** Photocurrent-voltage curve of DSSC with  $\text{TiO}_2/\text{YbF}_3\text{-Ho@TiO}_2$  under 980 nm laser illumination.

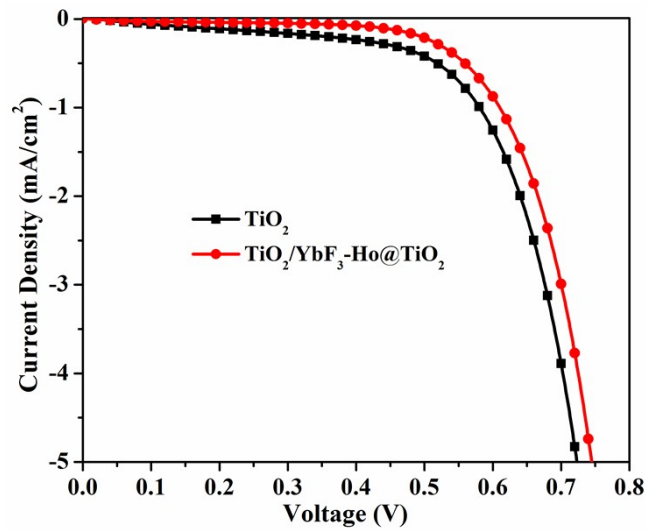

**Fig. S10** Dark current-voltage curves of DSSCs assembled with  $\text{TiO}_2$  and  $\text{TiO}_2/\text{YbF}_3\text{-Ho@TiO}_2$  photoanodes.
